# Supplementary material for: Constitutive IDO1 Expression in Human Tumors Is Driven by Cyclooxygenase-2 and Mediates Intrinsic Immune Resistance
Source: Oxford University Press journal article supplement (doi:10.1158/2326-6066.cir-16-0400), 2017-07-21
Supplement: 23266066cir160400-sup-176734_2_supp_4128789_qs8zcn.docx [file 23266066cir160400-sup-176734_2_supp_4128789_qs8zcn.docx]

***Table S1. Human tumor cell lines used in this study***

| **Cancer cell line** | **Cancer types** | ***IDO1* expression (transcripts per 4000 transcripts of *GAPDH*)** | **Mutations** |
| --- | --- | --- | --- |
| MZ-CHA-3 | Cholangiocarcinoma | 150 | PIK3CA E545K* |
| LB1610-MEL | Melanoma | 150 | *BRAF* V600E, PTEN Null* |
| KUL98-MELA | Melanoma | 200 | *BRAF* V600E* |
| LB919-SCCHN | Head and neck carcinoma | 30 | ERBB2 I655V* |
| LB188-SAR | Sarcoma | 70 | None |
| SKOV3 | Ovarian carcinoma | 120 | PIK3CA H1047R†1 |
| NCI-H596 | Non-small cell lung carcinoma | 8 | PIK3CA E545K†2 |
| LS411N | Colorectal carcinoma | 0 | *BRAF* V600E* |

* Data from in house RNAseq analysis.

† CCLE database from the Broad Institute.

1 Published: Whyte DB, Holbeck SL. Correlation of PIK3Ca mutations with gene expression and drug sensitivity in NCI-60 cell lines. *Biochem Biophys Res Commun* **2006**;340(2):469-75.

2 Published: Yamamoto H, Shigematsu H, Nomura M, Lockwood WW, Sato M, Okumura N*, et al.* PIK3CA mutations and copy number gains in human lung cancers. *Cancer Res* **2008**;68(17):6913-21.
