# Supplementary material for: Constitutive IDO1 Expression in Human Tumors Is Driven by Cyclooxygenase-2 and Mediates Intrinsic Immune Resistance
Source: Oxford University Press journal article supplement (doi:10.1158/2326-6066.cir-16-0400), 2017-07-21
Supplement: 23266066cir160400-sup-sf4.pdf [file 23266066cir160400-sup-sf4.pdf]

## Suppl. Fig. 4

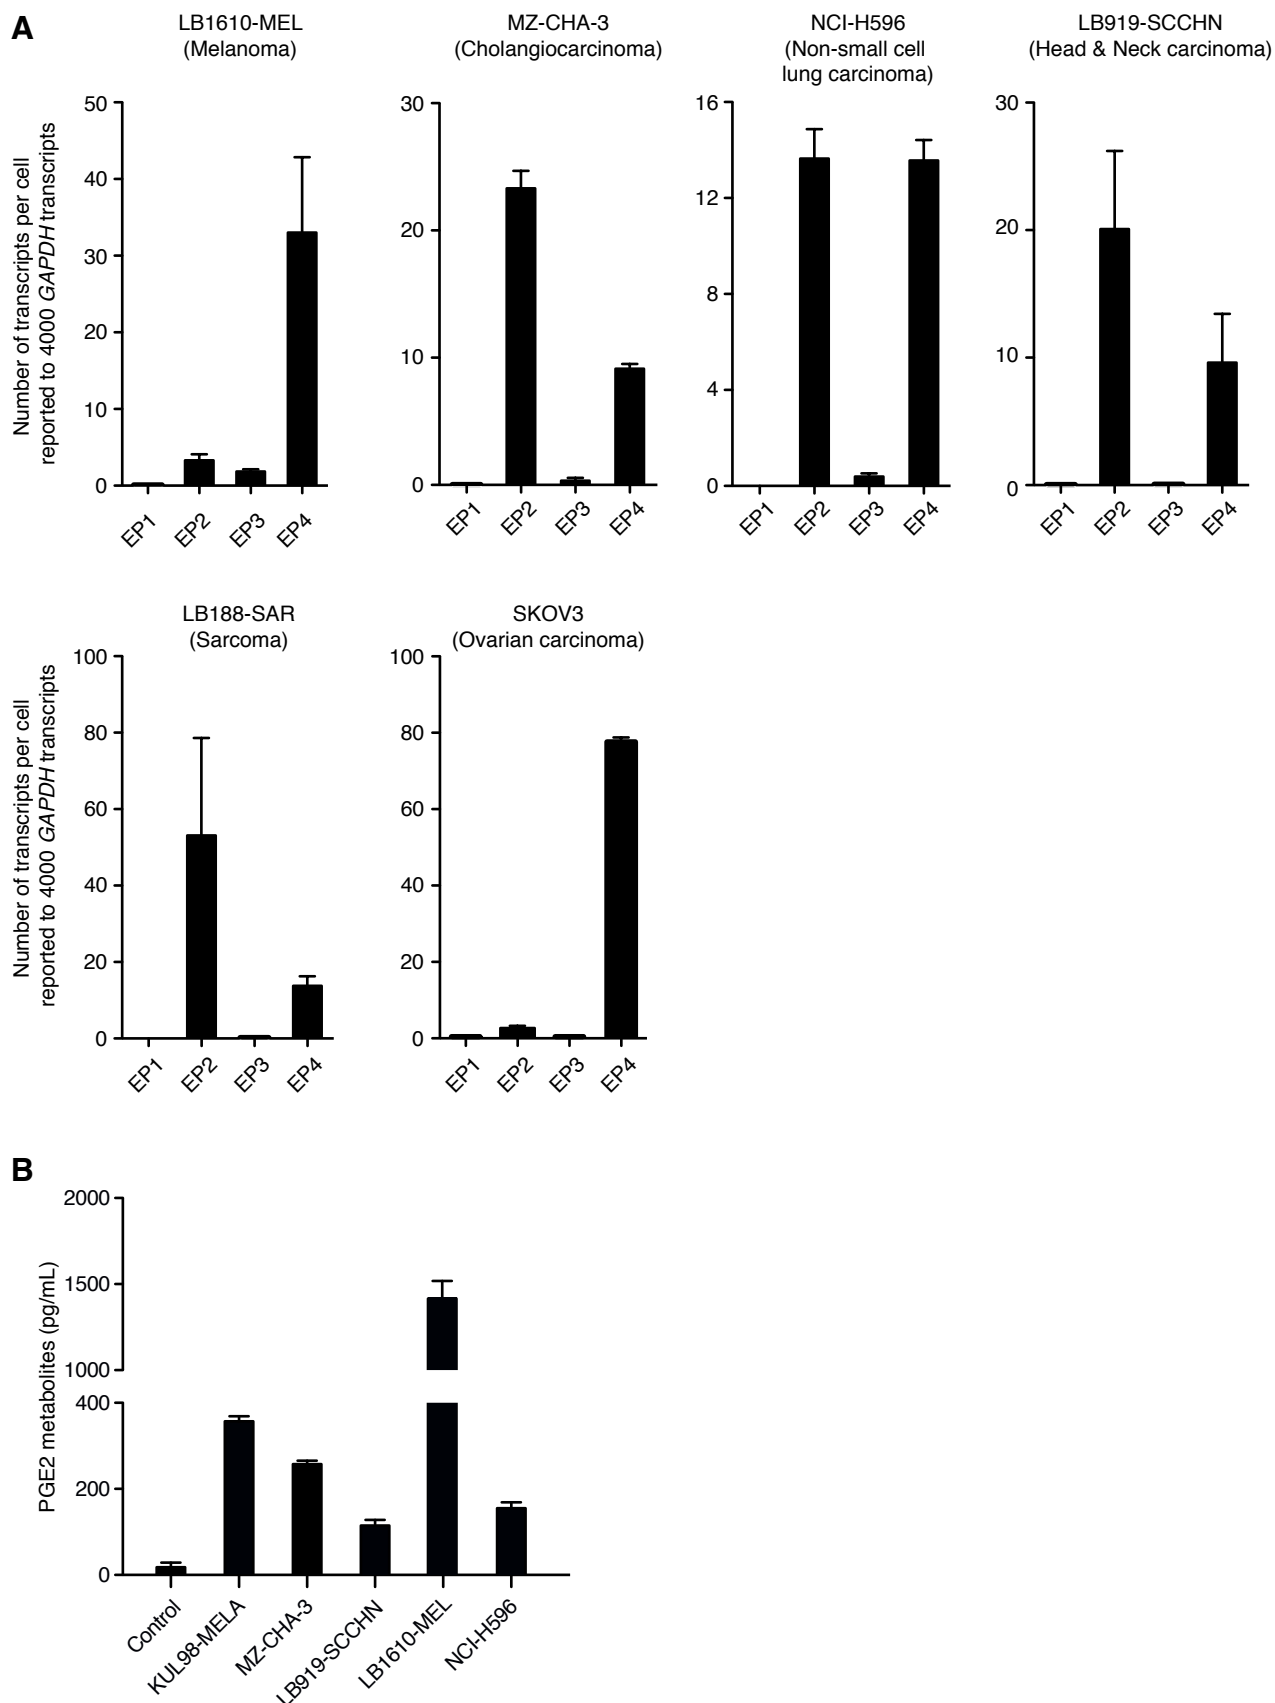

**Fig. S4 (Related to Fig. 6): Quantification of EP receptors and PGE<sub>2</sub> production in different cancer cell lines**

**A.** Quantification by RT-qPCR of the EP receptor transcripts (EP1-4) was performed on RNA extracted from LB1610-MEL, MZ-CHA-3, NCI-H596, LB919-SCCHN, LB188-SAR and SKOV3 cells. **B.** LB1610-MEL, KUL98-MELA, MZ-CHA-3, NCI-H596 and LB919-SCCHN cells were cultured in X-VIVO 15 medium for 5 days before harvesting the supernatant and testing for the presence of PGE<sub>2</sub> metabolites. (Data represented are Mean+SD; all experiments were repeated 3 times)
